# Supplementary figures and images for: The molecular basis of Abelson kinase regulation by its αI-helix
Source: eLife journal article supplement (doi:10.7554/elife.92324), 2023-11-01

**B**

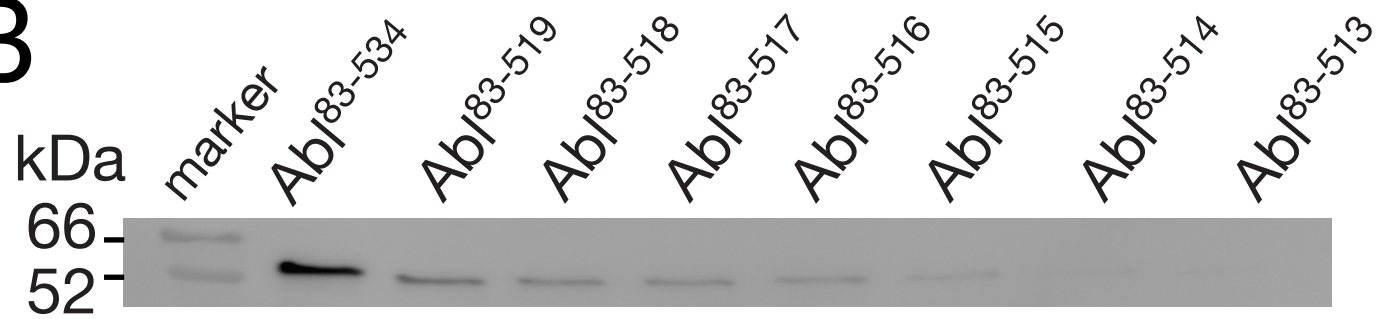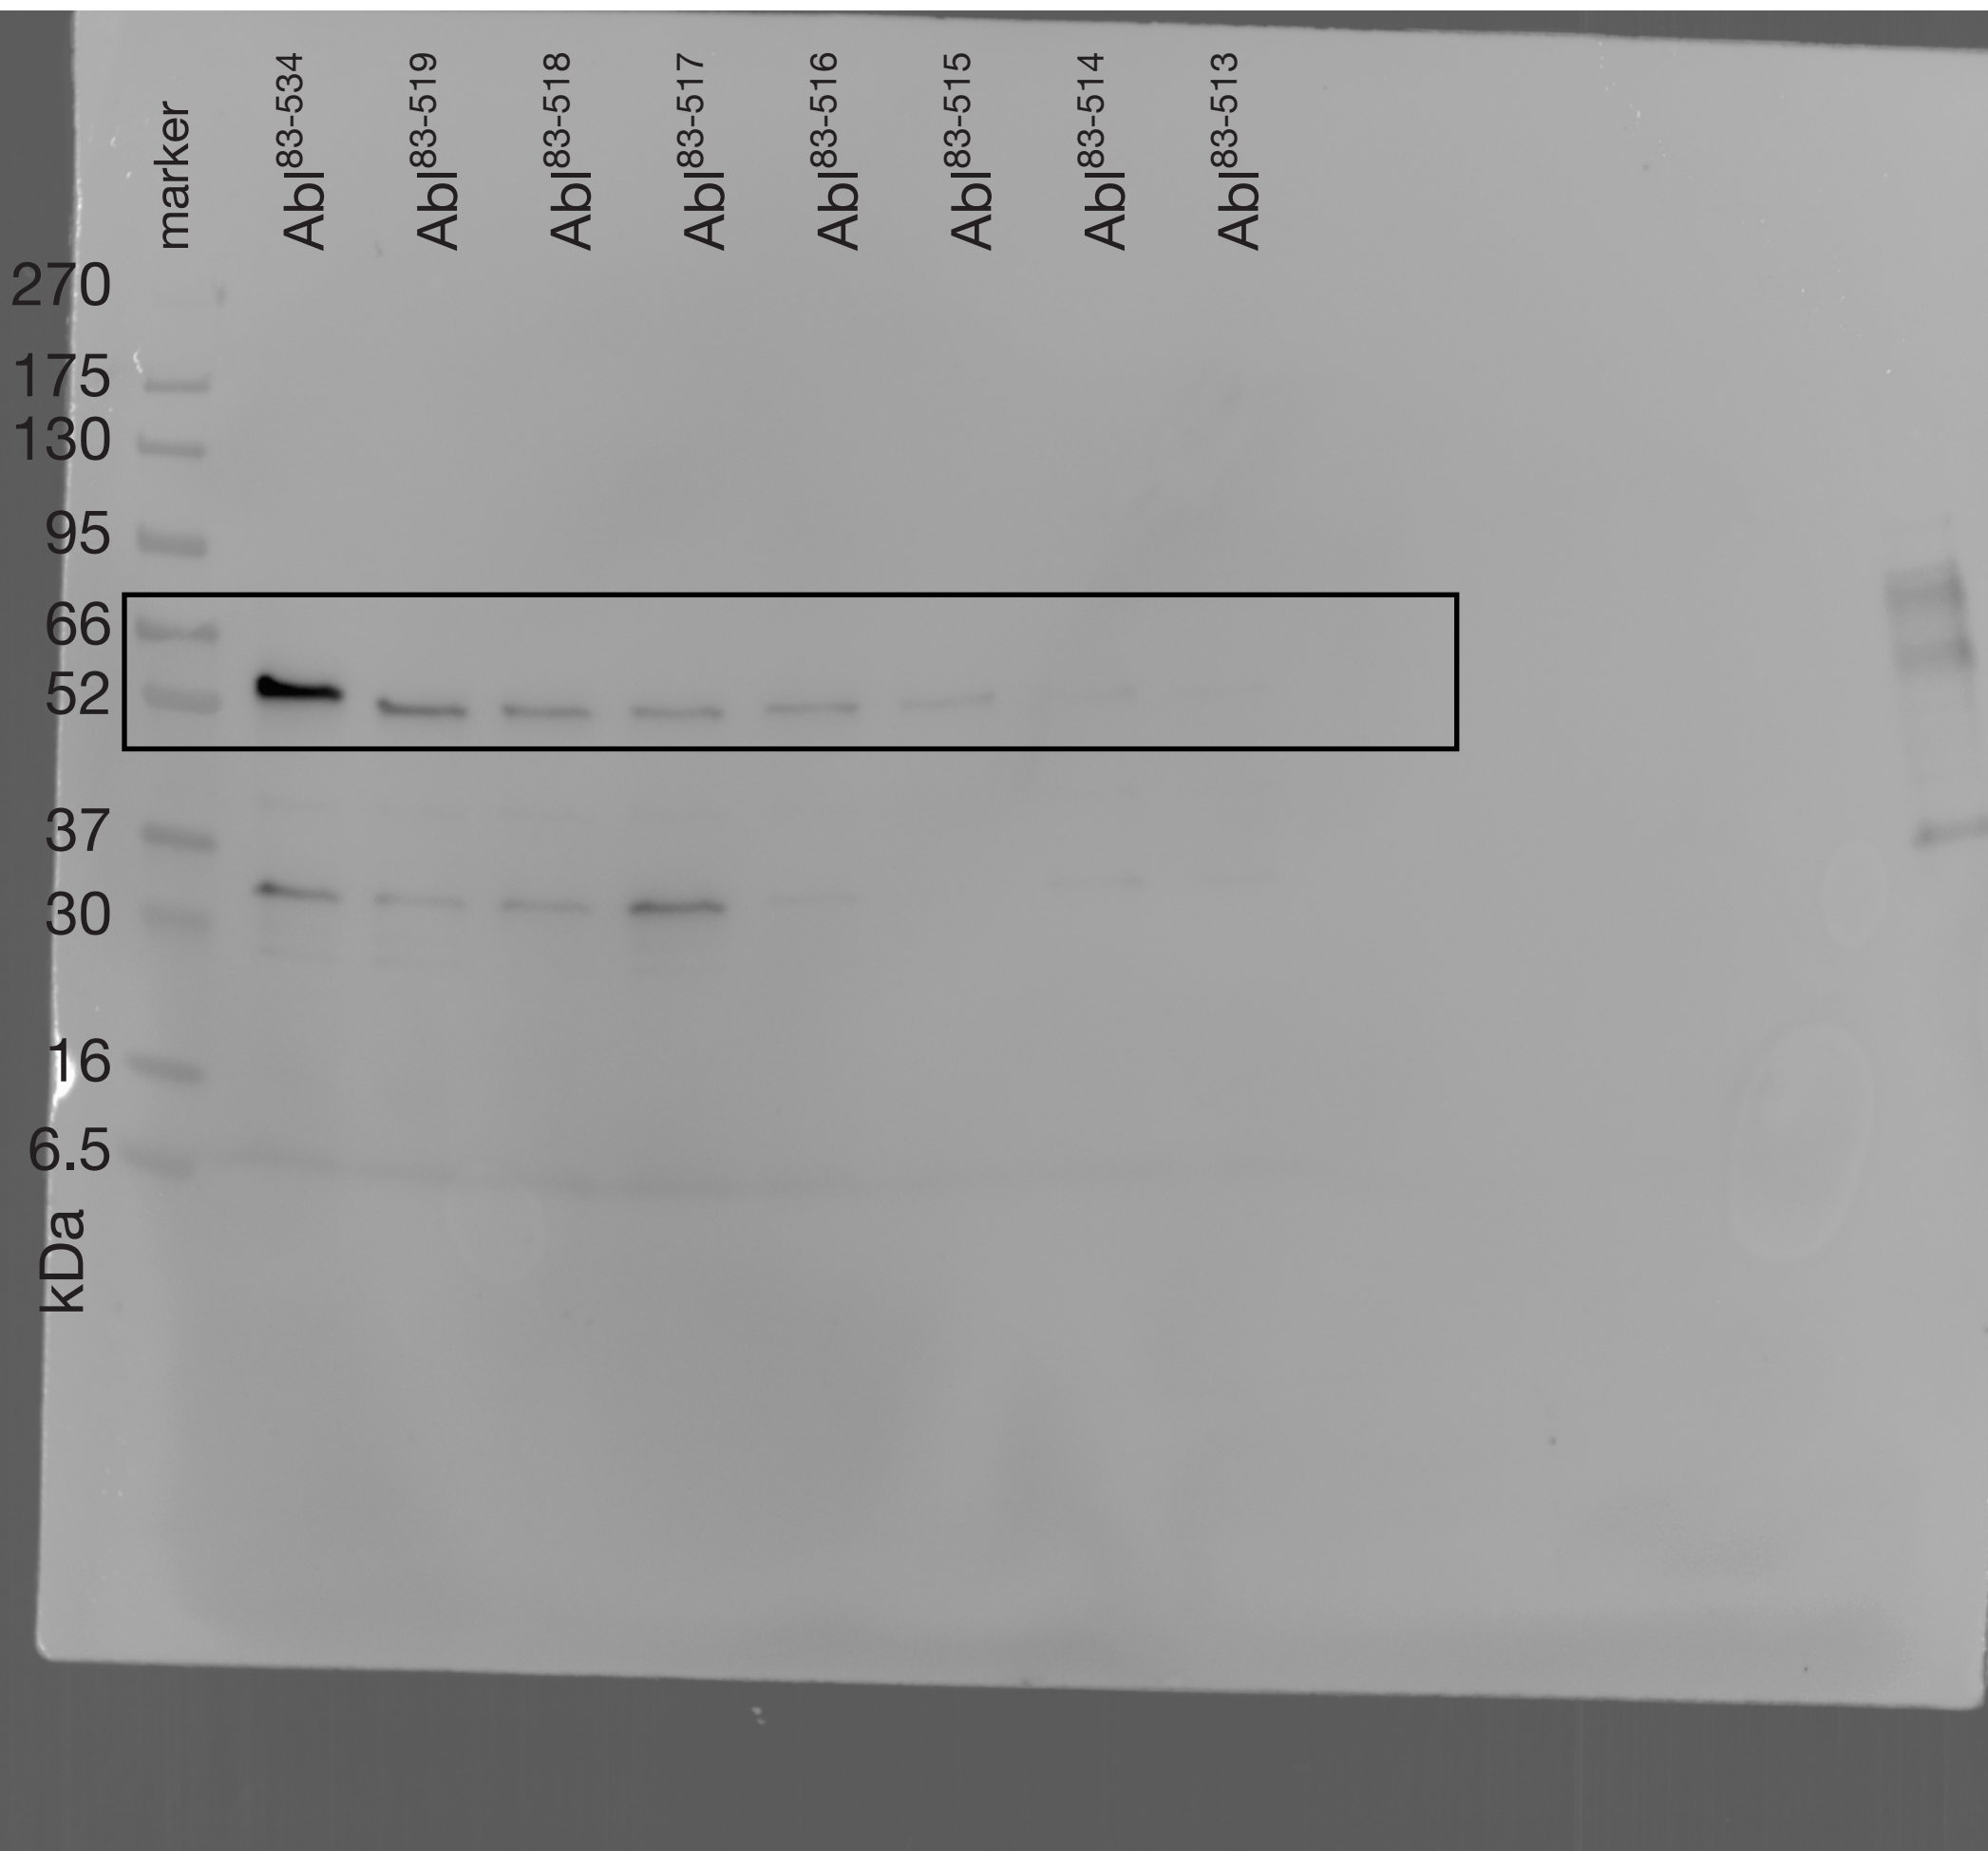

Supplement: fig2-data2 [file elife-92324-fig2-data2-v1.zip]
